# Supplementary material
Source: PubMed Central journal article supplement (PMC7965191)
Supplement: 4018.table.pdf [file 4018.table.pdf]

**On-line Table: Clinical information and findings obtained on conventional MRI**

| Case/Age<br>(yr)/Sex | Histologic Diagnosis                             | Lesion          | Contrast    | Peritumoral |             | Necrosis | Distant       |
|----------------------|--------------------------------------------------|-----------------|-------------|-------------|-------------|----------|---------------|
|                      |                                                  | Location        | Enhancement | Edema       | Mass Effect |          | Tumor<br>Foci |
| 1/69/M               | Anaplastic astrocytoma                           | Thalamus        | Moderate    | Moderate    | Mild        | Yes      | No            |
| 2/29/M               | Oligodendroglioma                                | Frontal         | Absent      | Moderate    | Mild        | No       | No            |
| 3/52/F               | Oligodendroglioma                                | Temporal        | Moderate    | Mild        | Mild        | No       | No            |
| 4/68/M               | Oligodendroglioma                                | Frontal         | Mild        | Moderate    | Mild        | No       | No            |
| 5/62/F               | Anaplastic astrocytoma                           | Hippocampus     | Absent      | Mild        | Mild        | No       | No            |
| 6/49/F               | Glioblastoma                                     | Frontal         | Moderate    | Extensive   | Moderate    | Yes      | Yes           |
| 7/77/M               | Glioblastoma with oligodendroglioma<br>component | Frontal         | Extensive   | Extensive   | Moderate    | Yes      | Yes           |
| 8/42/F               | Glioblastoma                                     | Parietal        | Extensive   | Extensive   | Moderate    | Yes      | No            |
| 9/60/F               | Diffuse astrocytoma                              | Frontal         | Mild        | Moderate    | Mild        | No       | No            |
| 10/69/F              | Anaplastic oligodendroglioma                     | Frontal         | Moderate    | Moderate    | Mild        | Yes      | No            |
| 11/74/M              | Glioblastoma                                     | Parietal        | Moderate    | Moderate    | Moderate    | Yes      | No            |
| 12/82/F              | Glioblastoma                                     | Temporal        | Moderate    | Mild        | Mild        | No       | No            |
| 13/26/F              | Diffuse astrocytoma                              | Frontal         | Absent      | Extensive   | Mild        | No       | No            |
| 14/76/F              | Anaplastic oligoastrocytoma                      | Insula          | Absent      | Mild        | Mild        | No       | No            |
| 15/16/M              | Anaplastic oligodendroglioma                     | Frontal         | Mild        | Extensive   | Moderate    | No       | No            |
| 16/41/M              | Oligoastrocytoma                                 | Frontal         | Mild        | Mild        | Mild        | No       | No            |
| 17/63/F              | Anaplastic astrocytoma                           | Fronto-temporal | Mild        | Extensive   | Extensive   | Yes      | No            |
| 18/62/M              | Oligoastrocytoma                                 | Hippocampus     | Absent      | Mild        | Mild        | No       | No            |
| 19/63/M              | Glioblastoma                                     | Basal ganglia   | Moderate    | Mild        | Moderate    | No       | No            |
| 20/68/F              | Glioblastoma                                     | Parietal        | Mild        | Moderate    | Mild        | Yes      | No            |
| 21/63/F              | Glioblastoma                                     | Temporal        | Extensive   | Moderate    | Moderate    | Yes      | No            |
| 22/72/M              | Glioblastoma                                     | Frontal         | Moderate    | Mild        | Mild        | Yes      | Yes           |
| 23/31/F              | Oligodendroglioma                                | Frontal         | Mild        | Moderate    | Mild        | No       | No            |
| 24/80/F              | Diffuse astrocytoma                              | Parietal        | Mild        | Moderate    | Mild        | No       | No            |
| 25/60/F              | Glioblastoma                                     | Frontal         | Extensive   | Extensive   | Extensive   | Yes      | No            |
| 26/78/F              | Glioblastoma                                     | Temporal        | Mild        | Moderate    | Mild        | No       | No            |
| 27/59/F              | Glioblastoma                                     | Temporal        | —           | Extensive   | Moderate    | No       | No            |
| 28/65/M              | Anaplastic oligodendroglioma                     | Parietal        | Moderate    | Moderate    | Mild        | No       | No            |
| 29/74/M              | Glioblastoma                                     | Temporal        | Moderate    | Moderate    | Moderate    | Yes      | No            |
| 30/47/F              | Anaplastic oligodendroglioma                     | Frontal         | Mild        | Moderate    | Mild        | Yes      | No            |
| 31/65/F              | Glioblastoma                                     | Basal ganglia   | Moderate    | Moderate    | Moderate    | Yes      | No            |
| 32/71/M              | Glioblastoma                                     | Occipital       | Extensive   | Extensive   | Extensive   | Yes      | No            |

**Note:**— indicates patient was unable to undergo an examination by using contrast agent due to her current treatment with dialysis.
